# Supplementary material for: In situ control of polymer helicity with a non-covalently bound photoresponsive molecular motor dopant
Source: Royal Society of Chemistry journal article supplement (doi:10.1039/c7cc03188b), 2017-01-01
Supplement: c7cc03188b1.pdf [file c7cc03188b1.pdf]

## SUPPORTING INFORMATION

### In situ control of polymer helicity with a non-covalently bound photoresponsive molecular motor dopant

Thomas van Leeuwen, G. Henriëke Heideman, Depeng Zhao, Sander J. Wezenberg\* and Ben L. Feringa\*

Centre for Systems Chemistry, Stratingh Institute for Chemistry, University of Groningen, Nijenborgh 4, 9747 AG, Groningen, The Netherlands

\*E-mail: s.j.wezenberg@rug.nl; b.l.feringa@rug.nl

#### Contents

|                                                                  |   |
|------------------------------------------------------------------|---|
| General Remarks .....                                            | 2 |
| CD spectra: photoisomerization of <b>2</b> .....                 | 3 |
| <sup>1</sup> H-NMR spectra: photoisomerization of <b>2</b> ..... | 4 |
| Eyring Plot of THI of <b>2</b> .....                             | 5 |
| UV/Vis and CD spectra of <b>1</b> .....                          | 6 |
| References.....                                                  | 9 |

## General Remarks

All reagents were obtained from commercial sources and used as received without further purification. Solvents for reactions were reagent grade and distilled and dried according to standard procedures.  $^1\text{H-NMR}$  and  $^{13}\text{C-NMR}$  spectra were recorded on Varian AMX400 instrument. Compounds **1**<sup>1</sup> and **2**<sup>2</sup> were synthesized following procedures described in the literature. CD spectroscopy was performed on a Jasco J-715 or J-810 Spectropolarimeter in a 1 mm quartz cuvette. H<sub>2</sub>O was distilled twice prior to use. Irradiation experiments were performed using a Spectroline model ENB-280C/FE lamp ( $\lambda_{\text{max}} = 312 \text{ nm}$ ). The doping of **1** was performed in the following way: 1 mL of a solution of **2** in Et<sub>2</sub>O (0.1 mg/mL) was layered on top of a 1 mL solution of **1** (1 mg/mL) in H<sub>2</sub>O. The biphasic system was stirred overnight to allow complete evaporation of the ether layer. The resulting suspension was filtered over a syringe filter and collected a 1 mm cuvette.

### CD spectra: photoisomerization of **2**

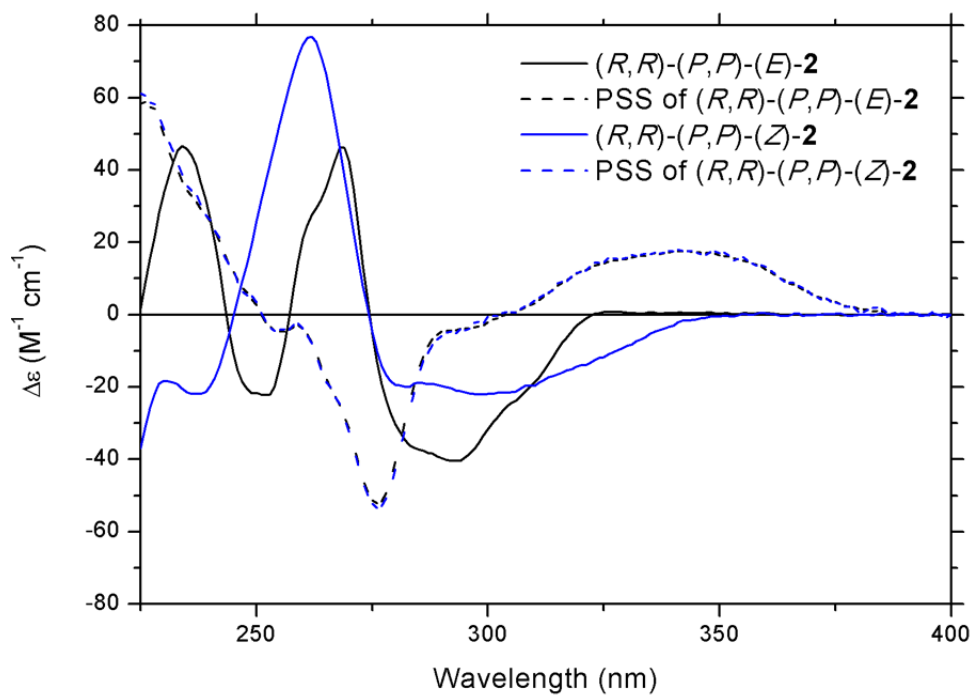

Figure S1: CD absorption spectra of solutions of **2** in Et<sub>2</sub>O, measured in a 1cm quartz cuvette.

## <sup>1</sup>H-NMR spectra: photoisomerization of 2

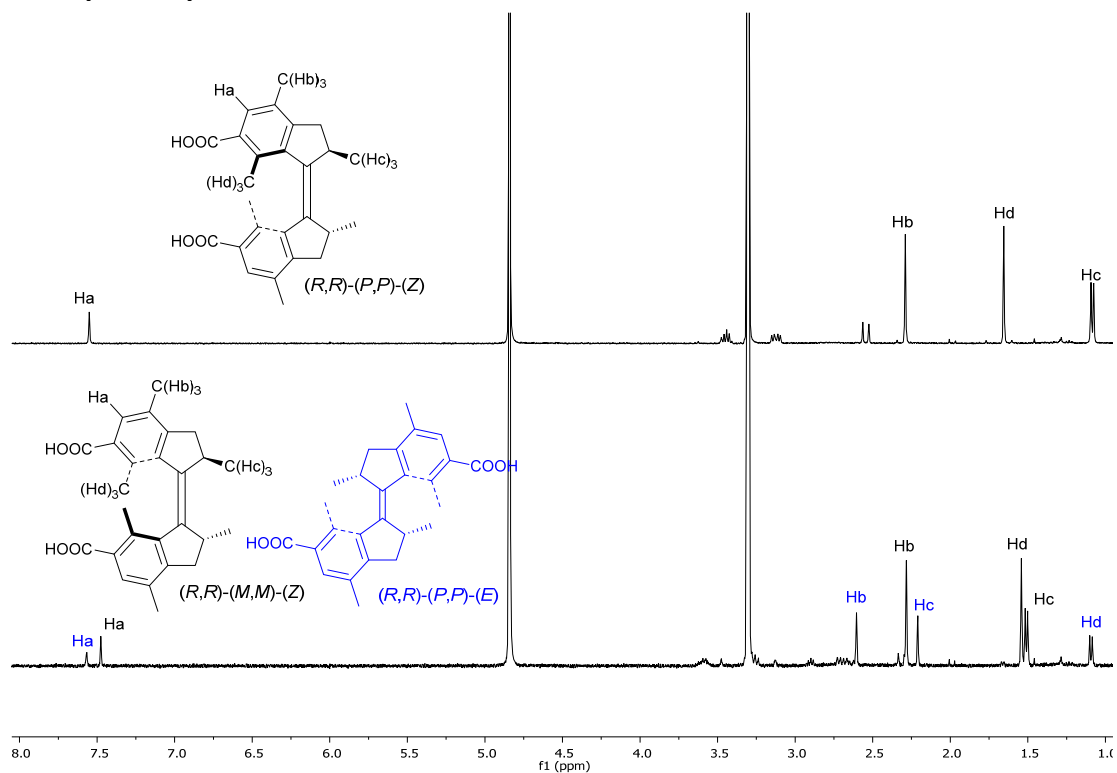

Figure S2: <sup>1</sup>H-NMR spectra (CD<sub>3</sub>OD at 25 °C) of the photoisomerization (312 nm) of *(P,P)*-*(Z)*-2 (top) into a PSS mixture (65:35) of *(M,M)*-*(Z)*-2 and *(P,P)*-*(E)*-2 (bottom).

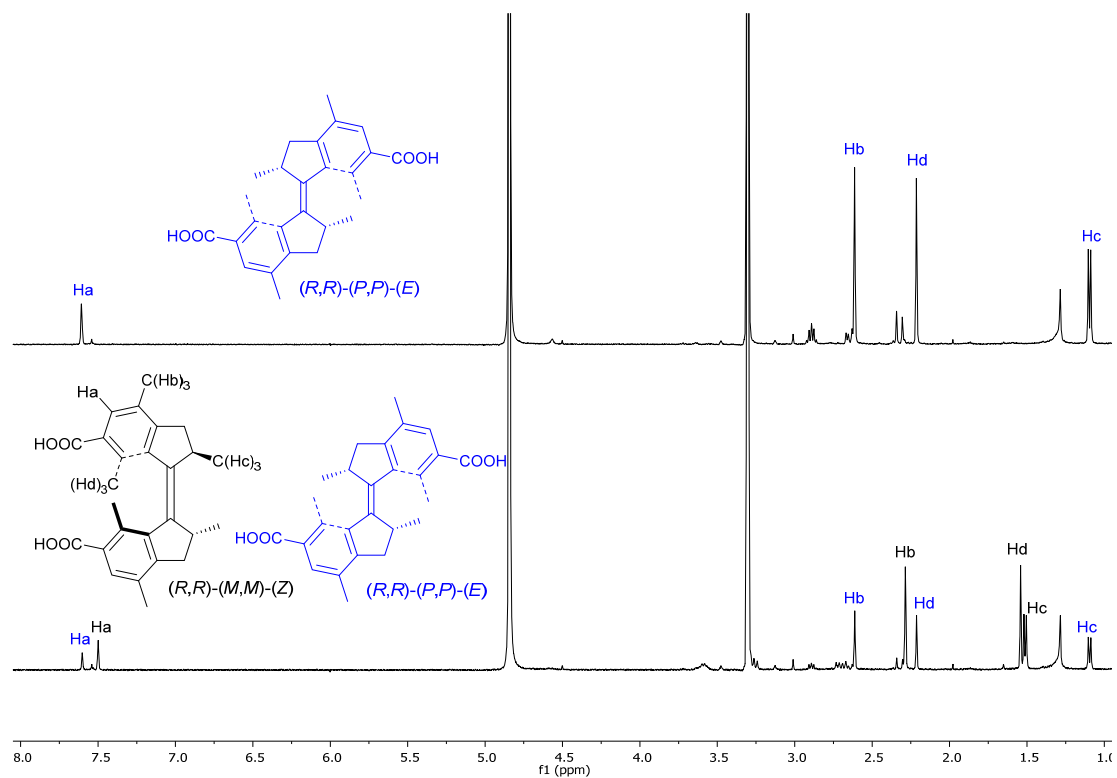

Figure S3: <sup>1</sup>H-NMR spectra (CD<sub>3</sub>OD at 25 °C) of the photoisomerization of *(P,P)*-*(Z)*-2 (top) into a PSS mixture (63:37) of *(M,M)*-*(Z)*-2 and *(P,P)*-*(E)*-2 (bottom).

### Eyring Plot of THI of 2.

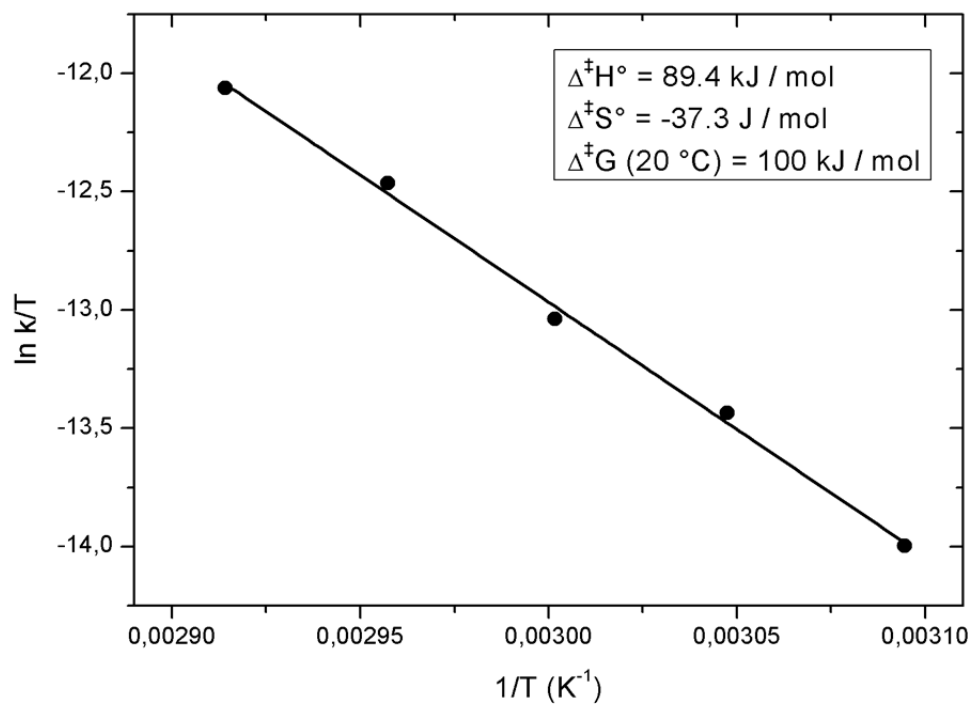

Figure S4: Eyring plot of the thermal relaxation of *(M,M)*-(*Z*)-**2** to *(P,P)*-(*Z*)-**2** in H<sub>2</sub>O. The rate constants for this process were determined by measuring the decrease in absorbance of the *(M,M)*-(*Z*)-**2** band at 360 nm at five different temperatures (50 °C, 55 °C, 60 °C, 65 °C, 70 °C).

### UV/Vis and CD spectra of **1**

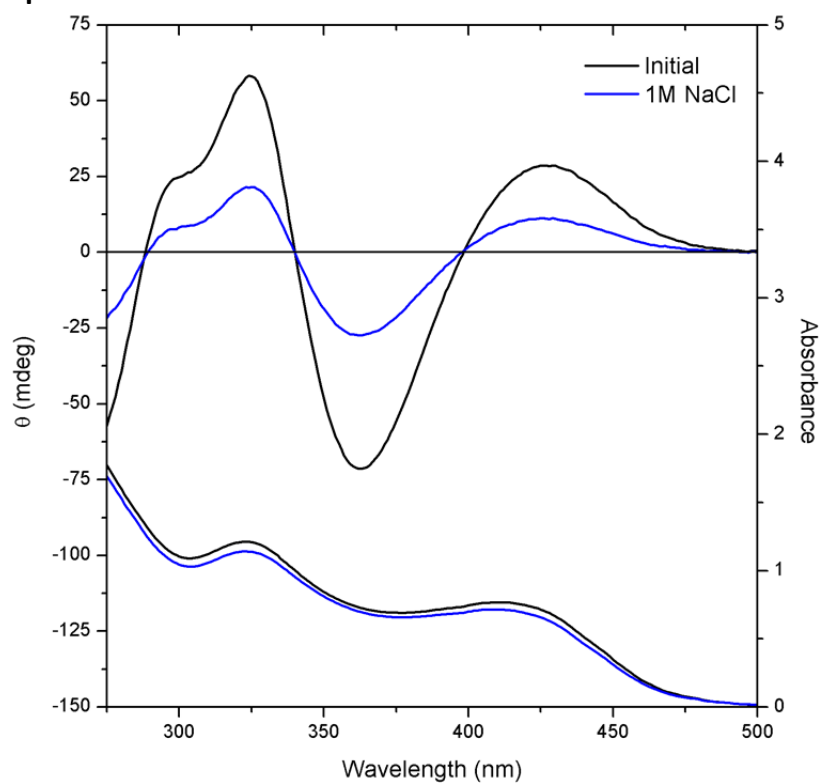

Figure S5: Effect of the addition of NaCl on the CD absorption spectrum of **1** (1.0 mg/mL) doped with  $(P,P)$ -(Z)-**2**.

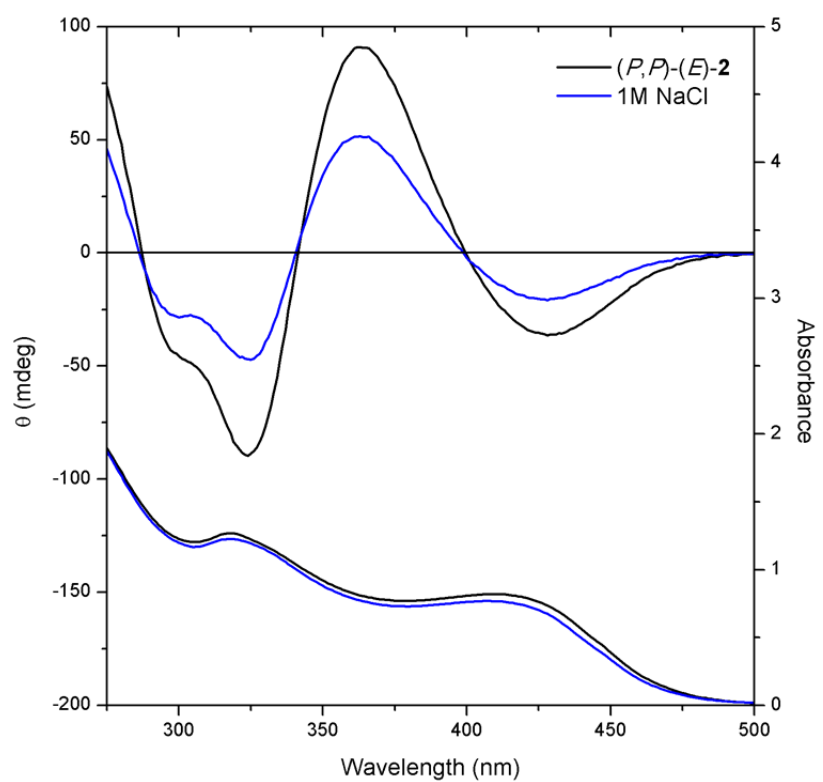

Figure S6: Effect of the addition of NaCl on the CD absorption spectrum of **1** (1.0 mg/mL) doped with  $(P,P)$ -(E)-**2**.

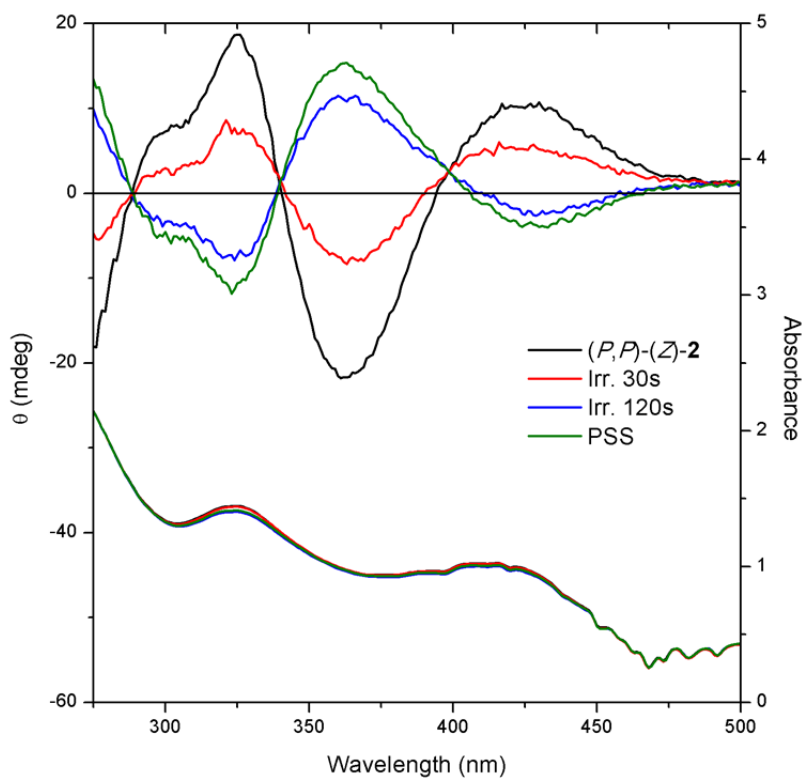

Figure S7: Changes in CD absorption spectrum of **1** (1 mg/mL in H<sub>2</sub>O with 1M NaCl) doped with (P,P)-(E)-2 upon irradiation at 312 nm. (Spectra are not baseline corrected).

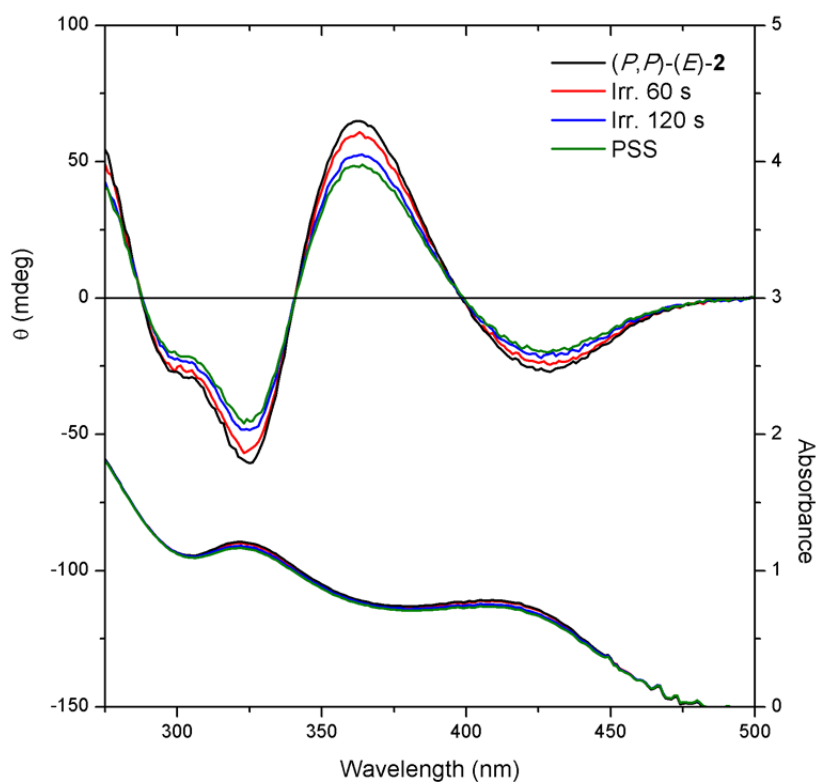

Figure S8: Changes in CD absorption spectrum of **1** (1 mg/mL in H<sub>2</sub>O with 1M NaCl) doped with (P,P)-(E)-2 upon irradiation at 312 nm.

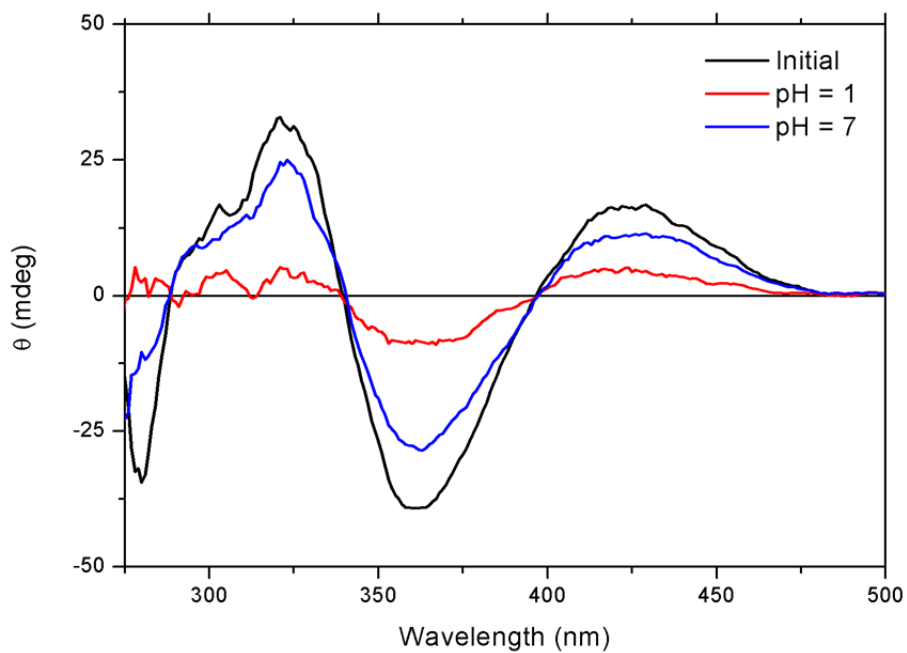

Figure S9: Changes in CD spectra of **1** (0.5 mg/mL) doped with *(P,P)*-*(Z)*-**2** at different pH values.



## References

- (1) H. Onouchi, T. Miyagawa, K. Morino and E. Yashima, *Angew. Chem. Int. Ed.*, 2006, **45**, 2381–2384.
- (2) D. Zhao, T. M. Neubauer and B. L. Feringa, *Nat. Commun.*, 2015, **6**, 6652.
